# Supplementary material for: Interaction with LC8 Is Required for Pak1 Nuclear Import and Is Indispensable for Zebrafish Development
Source: PubMed Central journal article supplement (PMC2698211; doi:10.1371/journal.pone.0006025), 2009-06-26

# Supplemental Figure 3

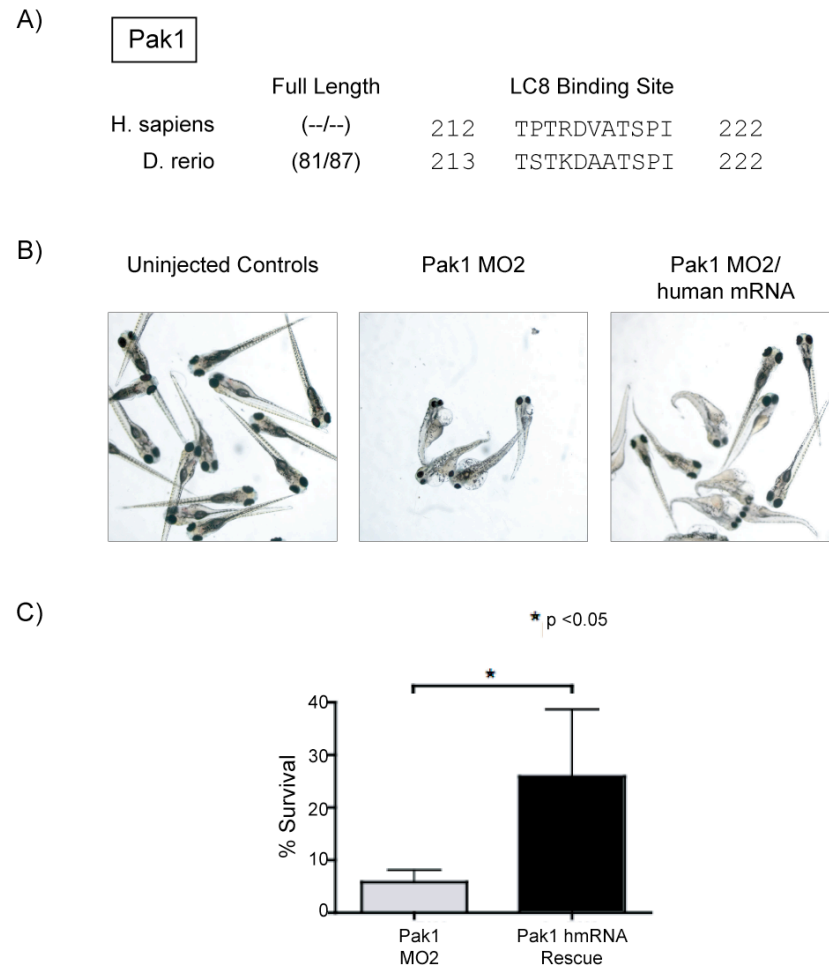

Supplement: pone.0006025.s004.pdf [file pone.0006025.s004.pdf]
