# Supplementary material for: Interaction with LC8 Is Required for Pak1 Nuclear Import and Is Indispensable for Zebrafish Development
Source: PLOS journal article supplement (doi:10.1371/journal.pone.0006025), 2009-06-25

Supplemental Figure 2

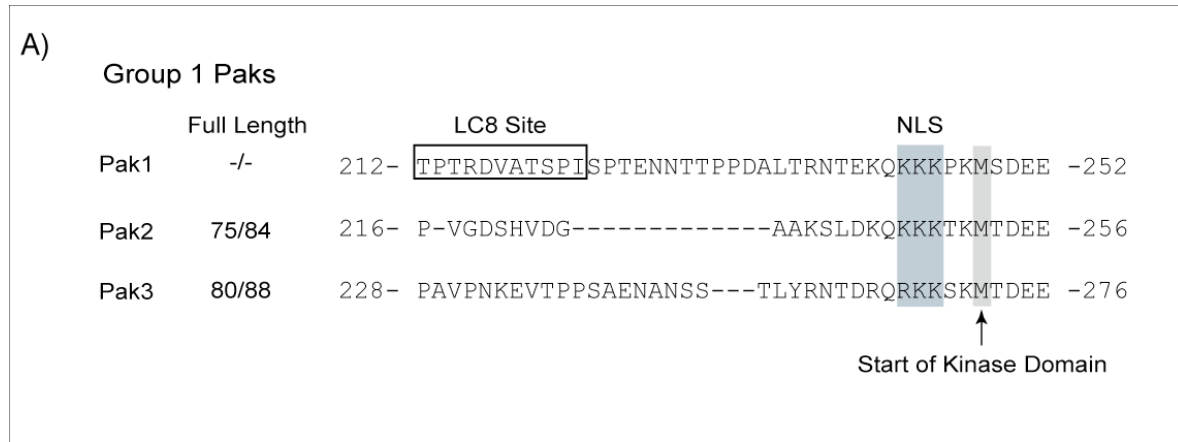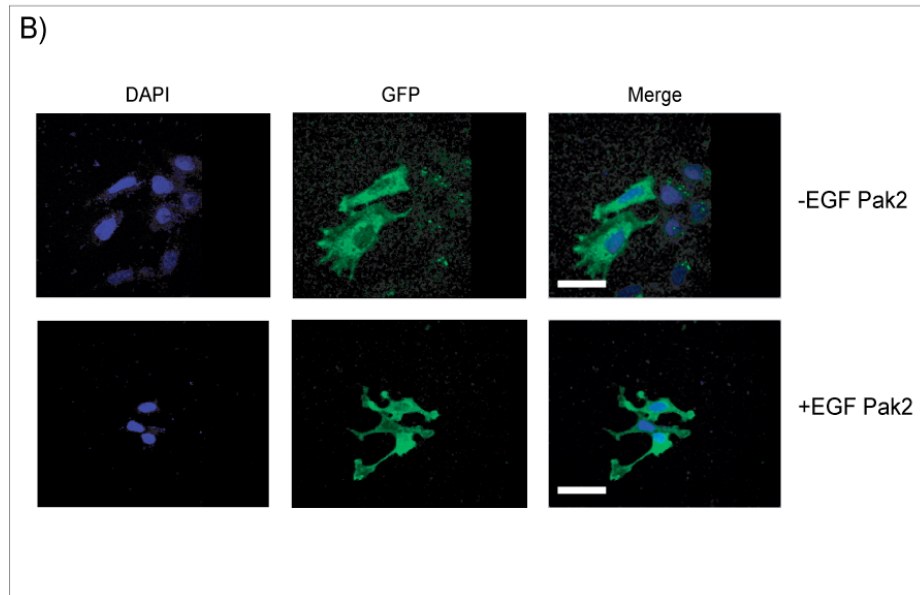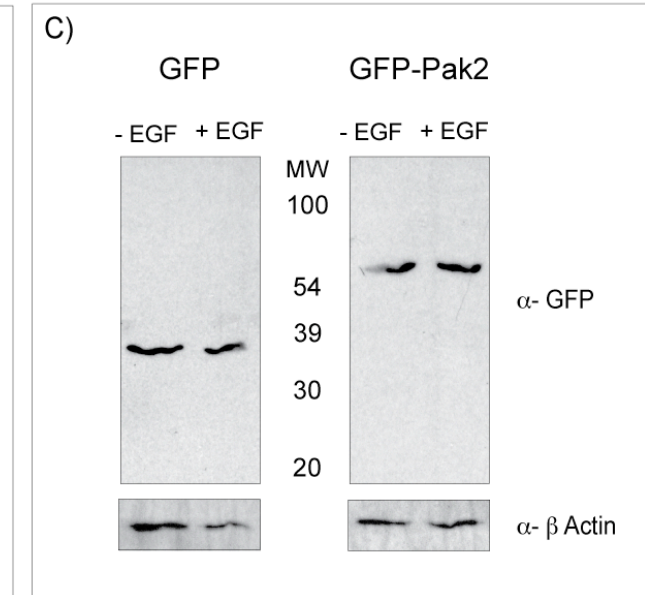

Supplement: S3 (10.1371/journal.pone.0006025.s003) [file journal.pone.0006025.s003]
